# 1 abmR: an R package for agent-based model analysis 2 of large-scale movements across taxa

3

4

5

6 Benjamin Gochanour<sup>1,2,\*</sup>, Javier Fernández-López<sup>3</sup>, Andrea Contina<sup>4</sup>

7 <sup>1</sup> Corix Plains Institute, University of Oklahoma, Five Partners Place, 201 Stephenson Parkway, Norman, OK  
8 73019, USA

9 <sup>2</sup> Oklahoma Biological Survey, University of Oklahoma, 111 East Chesapeake Street, SC Building 134,  
10 Norman, OK 73019, USA.

11 <sup>3</sup> University of Massachusetts Boston, Department of Biology, Integrated Sciences Complex, 100 Morrissey  
12 Blvd., Boston, MA 02125

13 <sup>4</sup> University of Colorado Denver, Department of Integrative Biology, Science Building 2074, Denver, CO  
14 80217, USA

15

16 \*Corresponding author

17 \*E-mail: gocha001@umn.edu

18 Benjamin Gochanour ORCID: 0000-0002-0950-1739

19 Andrea Contina ORCID: 0000-0002-0484-6711

20

21

22

23

24

25

26

27

28

29 **Abstract**

30 1. Agent-based modeling (ABM) shows promise for animal movement studies.

31 However, a robust, open-source, and spatially explicit ABM coding platform is  
32 currently lacking.

33 2. We present abmR, an R package for conducting continental-scale ABM simulations  
34 across animal taxa. The package features two movement functions, each of which  
35 relies on the Ornstein-Uhlenbeck (OU) model.

36 3. The theoretical background for abmR is discussed and the main functionalities are  
37 illustrated using two example populations.

38 4. Potential future additions to this open-source package may include the ability to  
39 specify multiple environmental variables or to model interactions between agents.

40 Additionally, updates may offer opportunities for disease ecology and integration with  
41 other R movement modeling packages.

42 **Keywords:**

43 Animal migration; R programming; computer simulations; ecology

44 **Abbreviated Title:** agent-based models in R

45

46

47

48

49

50

## 51 **1. INTRODUCTION**

52 Animal movement is a complex behavioral trait that affects the survival of populations and  
53 species across taxa (Berg, 1983; Dingle, 2014). Long- and short-distance movements can be  
54 predictable, allowing populations to take advantage of seasonal food resources (e.g.,  
55 migration), or more opportunistic, such as in the case of dispersal behaviors aimed at  
56 avoiding predators or finding potential mates (Giuggioli & Bartumeus, 2010). Thus, wild  
57 animals make decisions often based on environmental cues that lead to movement patterns  
58 characteristic of different populations across the landscape (Nathan et al., 2008; Dodge et al.,  
59 2014). However, obtaining a comprehensive understanding of large-scale animal movement  
60 behavior and population occurrence under climate change scenarios or habitat loss has proven  
61 to be a challenge (Araujo & Guisan, 2006). Moreover, while the research toolbox in  
62 movement ecology studies has seen a considerable expansion over the last two decades due to  
63 technological advancements of the tracking devices and molecular markers (Cushman and  
64 Lewis, 2010; Williams et al., 2020), the limitation of scaling up individual data to population-  
65 level inferences is still a substantial obstacle (Hawkes, 2009; but see Holdo & Roach, 2013).  
66 A promising research approach that may overcome the limitations of wildlife movement  
67 studies hindered by small sample sizes is represented by computer simulations within an  
68 Agent-based Modeling (ABM) framework (Tang & Bennett, 2010; Bridge et al., 2017).  
69 The core principle of ABM is to simulate a set of entities, called agents, which are defined by  
70 intrinsic properties as well as behavioral rules governing their interactions with the  
71 environment (Grimm & Railsback, 2013). That is, agents are described by their inherent  
72 attributes while dynamically interacting with external conditions such as the co-occurrence of  
73 other agents and/or changing features of their environmental setting . Thus, ABM has found  
74 applications in many study areas including biology, disease risk, social sciences, and

75 economics (Polhill et al., 2008; Grimm & Railsback, 2013; Kilmek et al., 2015; Willem et al.,  
76 2017) with the unifying goal of investigating and predicting the dynamics of complex  
77 systems (Grimm et al., 2005). In particular, wildlife studies have adopted the ABM approach  
78 to simulate population growth, reproduction, mortality rate, energy budget, and migration  
79 ecology, just to cite a few (Brown & Robinson, 2006; Lustig et al., 2019; Aurbach et al.,  
80 2020; Goldstein et al., 2021). However, we currently lack a robust and spatially explicit ABM  
81 coding platform for the implementation of large-scale animal movement investigations (but  
82 see Thiele et al. (2012) or Chubaty and McIntire (2021)). Here we present a novel ABM  
83 framework in the R programming language for applications in animal behavior and  
84 movement ecology broadly defined.

## 85 **2. PACKAGE OVERVIEW**

86 abmR allows for both computation and visualization of agent movement trajectories through  
87 a set of behavioral rules based on environmental parameters. The two movement functions,  
88 `moveSIM` and `energySIM`, provide the central functionality of the package, allowing the  
89 user to run simulations using an Ornstein-Uhlenbeck movement model (Uhlenbeck &  
90 Ornstein, 1930; hereafter OU). Additional functions provide a suite of visualization and data  
91 summarization tools intended to reduce the effort needed to go from results to presentation-  
92 ready figures and tables (Table 1). The package is currently available as a Github repository  
93 (<https://github.com/bgoch5/abmR>), but has been submitted to the Comprehensive R Archive  
94 Network (CRAN) to facilitate broader access and usage.

95

| Function     | Usage                                                                                     |
|--------------|-------------------------------------------------------------------------------------------|
| moveSIM      | Runs agent-based model movement simulations based on environmental data                   |
| moveVIZ      | Creates a plot or table of moveSIM() results                                              |
| energySIM    | Runs agent-based model movement and energy budget simulations based on environmental data |
| energyVIZ    | Creates a plot or table of energySIM() results                                            |
| tidy_results | Prints results from moveSIM() or energySIM() in an easier-to-read table                   |
| get_ex_data  | Downloads data that is used in examples in vignette and documentation                     |
| as.species   | Creates object of class 'species' for input into moveSIM() or energySIM()                 |

96

97 **Table 1.** Functions contained in the abmR package (v. 1.0.1). For more complete function

98 descriptions, consult the abmR manual.

99 Both movement functions used by abmR rely on the same OU model approach summarized

100 below. Given current agent location ( $x_t, y_t$ ), agent location at the subsequent timestep ( $x_{t+1},$

101  $y_{t+1}$ ) is modeled according to the following equations:

$$102 \quad x_{t+1} = x_t + \sigma * Z + \phi_x * (\omega_x - x_t) \quad (1)$$

$$103 \quad y_{t+1} = y_t + \sigma * Z + \phi_y * (\omega_y - y_t) \quad (2)$$

104 Here,  $\sigma$  is the randomness parameter from the Brownian motion process that serves as a

105 multiplier on the error term  $Z$ , a single random number drawn from the Normal(0,1)

106 distribution. In addition,  $\phi_x$  and  $\phi_y$  are movement motivation or attraction strength for the OU

107 process in the longitude and latitude coordinates, respectively, while  $\omega_x$  and  $\omega_y$  are optimal x

108 (longitude) and y (latitude) coordinates, respectively. It is assumed that the origin point ( $x_1,$

109  $y_1$ ) is known. The OU model given in (1) and (2) performs similarly to a spring-coil. Greater

110 distance from optimal coordinates  $\omega_x$  and  $\omega_y$  acts like a compressed spring to propel distant

111 agents towards  $\omega_x$  and  $\omega_y$ . On the other hand, agents closer to  $\omega_x$  and  $\omega_y$  will travel a shorter

112 distance on that timestep. However, the amount of movement also depends on  $\phi_x$  and  $\phi_y$ ,

113 because these motivations serve as a multiplier on  $(\omega_x - x_t)$  and  $(\omega_y - y_t)$ , respectively

114 (Eqns. 1 and 2).

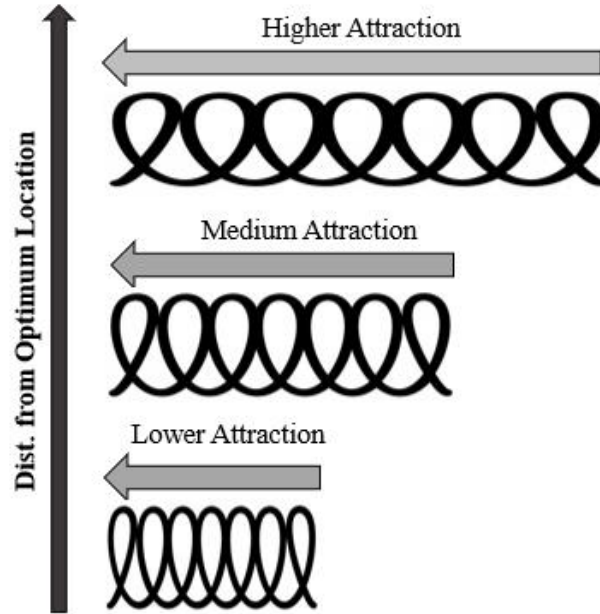

115

116 **Figure 1.** The OU model given in (1) and (2) performs like a spring-coil: agents further from their  
 117 target location experience higher attraction (and travel further), while agents closer to their destination  
 118 experience lesser attraction (and travel less far).

119 Both movement functions allow the user to optionally specify two morphological parameters.

120 These morphological parameters are used to compute adjusted agent motivations  $\phi_x$  and

121  $\phi_y$  from user-specified motivations  $\phi_{x0}$  and  $\phi_{y0}$ .

122 
$$\phi_x = \phi_{x0} + (\pm 0.1 * ((a - \mu_a) / S_a)) + (\pm 0.1 * ((b - \mu_b) / S_b)) \quad (3)$$

123 
$$\phi_y = \phi_{y0} + (\pm 0.1 * ((a - \mu_a) / S_a)) + (\pm 0.1 * ((b - \mu_b) / S_b)) \quad (4)$$

124 Here,  $a$ ,  $\mu_a$ , and  $S_a$  represent the observed value, population mean, and population standard  
 125 deviation for the first morphological parameter, respectively, while  $b$ ,  $\mu_b$ , and  $S_b$  represent

126 analogous quantities for the second morphological parameter. The sign on the numerical  
 127 constant 0.1 depends upon the hypothesized effect of each morphological parameter on agent  
 128 movement. If increasing values of the parameter lead to increasing motivation, a positive sign

129 should be used, and if increasing values of the parameter lead to decreasing motivation, a  
130 negative sign should be used. For example, if one hypothesizes that increasing mass leads to  
131 less movement motivation, a negative sign should be used for this parameter. The biological  
132 basis for including morphological parameters as a multiplier on motivation relies on previous  
133 research showing that individual and population intrinsic morphological characteristics affect  
134 migration speed, distance, and timing in many species (Alerstam, 1993; Hedenström, 2008).

135 While the two movement functions are distinct (see below), each follows the same basic two  
136 steps. The first, large-scale searching, is illustrated in Fig. 2. This step finds the ‘optimum’  
137 location for each agent ( $\omega_x$  and  $\omega_y$  coordinates from Eqns. (1) and (2)), that is, the geographic  
138 point with the optimal environmental raster value in a semicircular search region depending  
139 on movement orientation. For `moveSIM`, this optimal raster value is supplied directly, while  
140 for `energySIM` it is the average of the lower and upper bounds of a user-specified optimum  
141 range. The optimum value or range of values specified depends on the modeling scenario and  
142 the type of environmental raster that is used (e.g., vegetation, temperature, etc.).

143 Agents will move toward the selected optimum location. However, if the attraction strength  
144 ( $\phi_x$  and  $\phi_y$  in Eqns. (1) and (2)) is less than 1, agents will have a ‘target’ location short of the  
145 optimal location. Agents will move towards this target location with some error, which is  
146 generated by sampling from the normal distribution and multiplying by  $\sigma$ , as specified by the  
147 user (In Fig. 2,  $\sigma$  is 1). Because the support of the normal distribution consists of all real  
148 numbers, large deviations from the ‘target’ point are possible. However, because the normal  
149 distribution has low density at the extreme tails, outcomes are most likely to fall within a  
150 certain rectangle of the target, as illustrated in Fig. 2. This first step corresponds to the OU  
151 model of Eqns. (1) and (2).

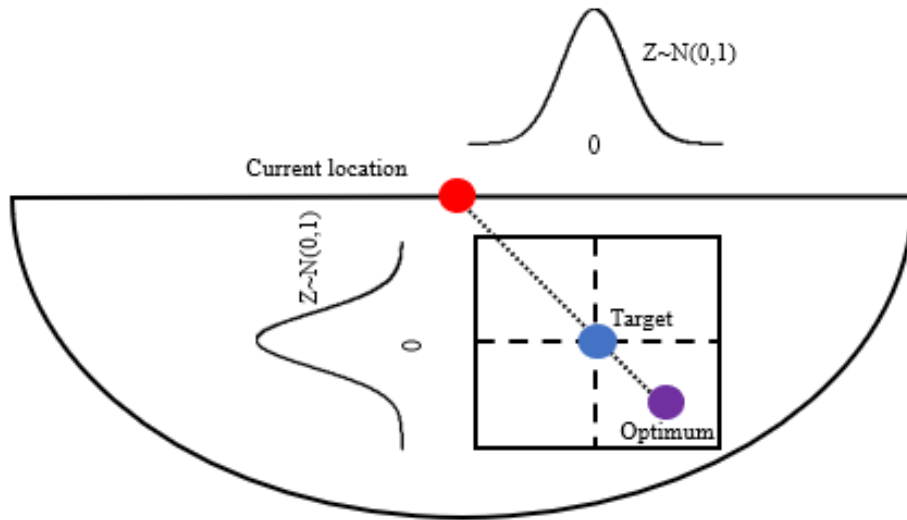

152

153 **Figure 2.** Illustration of large-scale searching specified by the OU model of Eqns. (1) and (2). Agents  
154 find an ‘optimum’ location within the semi-circular search region and then a ‘target’ location that lies  
155 on the line between the ‘current location’ and the ‘optimum’ location. If there is a tie between  
156 multiple potential ‘optimum’ cells, one is randomly selected from the list of tied cells to serve as the  
157 optimum. Random error is added by sampling from a  $Z \sim N(0, 1)$  distribution. Here,  $\sigma = 1$  and  $\phi_x =$   
158  $\phi_y < 1$ , where  $\sigma$  is the multiplier on the random error and  $\phi_x$  and  $\phi_y$  are the motivations in the x and y  
159 directions, respectively. Bounding box represents the most probable samples from the  $N(0,1)$   
160 distribution.

161 The second step is small-scale searching. Here, agents select the ‘best’ of the 8 neighboring  
162 cells (queen’s case or Moore neighborhood) after performing step 1, discussed above and in  
163 Fig 2. Again, ‘best’ here means the cell with environmental raster value closest to the agent’s  
164 user-defined optimum range. These two steps are then repeated for each timestep until the  
165 agent dies or proceeds through all timesteps. For the `moveSIM` function, agent death occurs  
166 when agents fail to achieve suitable environmental raster values for more than a user-  
167 specified number of consecutive timesteps. Here, what constitutes a ‘suitable’ cell is  
168 determined by the optimum value and an allowable deviation proportion, both also specified



169 by the user. For the `energySIM` function, agent death occurs when energy reaches zero. For  
170 both functions, users may choose to disable agent mortality. In the following subsections, we  
171 present the differences between `moveSIM` and `energySIM` functions and their underlying  
172 algorithms.

### 173 **2.1. Simulation function: `moveSIM`**

174 The function `moveSIM` runs an OU movement simulation based on environmental conditions  
175 provided by the user (e.g., raster), optionally including agent mortality and adjusted  
176 motivation according to user-specified morphological parameters. The function operates  
177 according to the following algorithm. Here, terms in *italics* are `moveSIM` function arguments  
178 (see Table 2).

179

| Argument        | Function | Usage                                           |
|-----------------|----------|-------------------------------------------------|
| replicates      | M, E     | number of agents to model                       |
| days            | M, E     | number of timesteps                             |
| modeled_species | M, E     | Species object from <code>as.species()</code>   |
| env_rast        | M, E     | Environmental raster                            |
| optimum         | M        | Optimal environmental value                     |
| optimum_lo      | E        | Lowest optimum environmental value              |
| optimum_hi      | E        | Highest optimum environmental value             |
| dest_x          | M, E     | Destination Longitude                           |
| dest_y          | M, E     | Destination Latitude                            |
| mot_x           | M, E     | Motivation (x direction)                        |
| mot_y           | M, E     | Motivation (y direction)                        |
| search_radius   | M, E     | Radius of semi-circular search region (km)      |
| direction       | M, E     | Movement direction: N, S, E, W, or R (Random)   |
| sigma           | M, E     | Randomness parameter                            |
| mortality       | M, E     | Incorporate agent mortality? T or F             |
| fail_thresh     | M        | Deviation from optimum constituting failure     |
| n_failures      | M        | Allowable number of failures before agent death |
| init_energy     | E        | Initial energy                                  |
| energy_adj      | E        | Energy gain/penalty vector                      |
| single_rast     | M, E     | Using a single-layer raster? T or F             |
| write_results   | M, E     | Save results as a csv? T or F                   |
| x               | S        | Origin longitude                                |
| y               | S        | Origin latitude                                 |
| morphpar1       | S        | Morphological parameter num. 1 observed value   |
| morphpar1mean   | S        | Morphological parameter num. 1 mean             |
| morphpar1sd     | S        | Morphological parameter num. 1 SD               |
| morphpar1sign   | S        | Morphological parameter num. 1 sign             |
| morphpar2       | S        | Morphological parameter num. 2 observed value   |
| morphpar2mean   | S        | Morphological parameter num. 2 mean             |
| morphpar2sd     | S        | Morphological parameter num. 2 SD               |
| morphpar2sign   | S        | Morphological parameter num. 2 sign             |

180

181 **Table 2.** List of arguments used in `moveSIM` (M), `energySIM` (E), or `as.species` (S). T: True,  
 182 F: False, SD: standard deviation. In text, these arguments are presented in *italics*. For a more complete  
 183 list of argument descriptions, see the `abmR` documentation.

184 The following algorithm applies when the argument *direction* is ‘N’, ‘S’, ‘E’, or ‘W’. For  
 185 random movement (*direction* = ‘R’) agents simply select a random point from a circle of

186 radius *search\_radius* for each timestep (Step 4). Here, let  $env\_rast(x_{t+1}, y_{t+1})$  be the value of  
187 *env\_rast* at the point  $(x_{t+1}, y_{t+1})$ . The core algorithm shown here assumes that *env\_rast*  
188 contains no undefined (N/A) grid cells.

- 189 1. If morphological parameters are specified, compute adjusted motivations  
190  $\phi_x$  and  $\phi_y$  according to (3) and (4), respectively. If not, set  $\phi_x = \phi_{x0}$  and  $\phi_y = \phi_{y0}$ ,  
191 where  $\phi_{x0}$  and  $\phi_{y0}$  are *mot\_x* and *mot\_y*, respectively.
- 192 2. Specify  $(x_1, y_1)$  using *x* and *y* contained in *modeled\_species*.
- 193 3. Set failures = 0
- 194 4. For day *t* in 1:(*days*-1)
  - 195 a. Create a search area defined as a semicircle of radius *search\_radius*  
196 facing *direction* and centered at  $(x_t, y_t)$
  - 197 b. Determine  $(\omega_x, \omega_y)$  as location within the search area with *env\_rast*  
198 cell value closest to *optimum*. Draw a random sample ( $n = 1$ ) in case of  
199 ties.
    - 200 i. If  $(dest_x, dest_y)$  in search area, set  $(\omega_x, \omega_y) = (dest_x, dest_y)$
  - 201 c. Large scale searching: determine  $(x_{t+1}, y_{t+1})_0$  according to (1) and (2).
  - 202 d. Small scale searching: determine  $(x_{t+1}, y_{t+1})$  by selecting location  
203 within eight neighboring cells (queen's case) of  $(x_{t+1}, y_{t+1})_0$  with the  
204 cell value closest to *optimum*. Draw a random sample ( $n = 1$ ) in case of  
205 ties.
- 206 Perform (e)-(f) if *mortality* = True.
  - 207 e. If observed  $env\_rast(x_{t+1}, y_{t+1}) - optimum > optimum * fail\_thresh$ , set  
208 failures = failures + 1. If not, set failures = 0.

- 209                   f. If failures >  $n\_failures$ , the agent dies. Set  $(x_{t+1}, y_{t+1})$  through  
210                    $(x_{days}, y_{days})$  as N/A and end loop.  
211                   5. Return dataframe with  $days$  rows and 2 columns movement track data.  
212                   6. Repeat (3)-(5)  $replicates$  times.

## 213 **2.2. Simulation function: energySIM**

214 The function `energySIM` builds on `moveSIM` by allowing for dynamic agent energy levels  
215 that are affected by the quality of environmental values achieved. These initial user-defined  
216 energy levels then serve as a driver of mortality and movement distance per timestep. It  
217 operates according to the following algorithm. Here, terms in *italics* are `energySIM`  
218 function arguments (see Table 2) or calculated variables (e.g., *optimum*, *energy*).

219 The following algorithm applies when the argument *direction* is ‘N’, ‘S’, ‘E’, or ‘W’. For  
220 random movement (*direction* = ‘R’) agents simply select a random point from a circle of  
221 radius *search\_radius* for each timestep (Step 5). Here, let  $env\_rast(x_{t+1}, y_{t+1})$  be the value of  
222 *env\_rast* at the point  $(x_{t+1}, y_{t+1})$ . The core algorithm shown here assumes that *env\_rast*  
223 contains no undefined (N/A) grid cells.

- 224                   1. If morphological parameters are specified, compute adjusted motivations  
225                    $\phi_x$  and  $\phi_y$  according to (3) and (4), respectively. If not, set  $\phi_x = \phi_{x0}$  and  $\phi_y =$   
226                    $\phi_{y0}$ , where  $\phi_{x0}$  and  $\phi_{y0}$  are *mot\_x* and *mot\_y*, respectively.  
227                   2. Compute *optimum* as  $(optimum\_hi - optimum\_lo)/2$ .  
228                   3. Specify  $(x_1, y_1)$  using  $x$  and  $y$  contained in *modeled\_species*.  
229                   4. Set *energy* = *init\_energy*  
230                   5. For day  $t$  in  $1:(days-1)$

- 231 a. If *mortality* = True, update *search\_radius* as *search\_radius* =  
232 *search\_radius* \* (*energy/init\_energy*).
- 233 b. Create a search area defined as a semicircle of radius *search\_radius*  
234 facing *direction* and centered at (*x<sub>t</sub>*, *y<sub>t</sub>*).
- 235 c. Determine ( $\omega_x, \omega_y$ ) as location within the search area with *env\_rast*  
236 cell value closest to *optimum*. Draw a random sample (n = 1) in case of  
237 ties.
- 238 i. If (*dest\_x*, *dest\_y*) in search area, set ( $\omega_x, \omega_y$ ) = (*dest\_x*,  
239 *dest\_y*)
- 240 d. Large scale searching: determine (*x<sub>t+1</sub>*, *y<sub>t+1</sub>*)<sub>0</sub> according to (1) and (2).
- 241 e. Small scale searching: determine (*x<sub>t+1</sub>*, *y<sub>t+1</sub>*) by selecting location  
242 within eight neighboring cells (queen's case) of (*x<sub>t+1</sub>*, *y<sub>t+1</sub>*)<sub>0</sub> with the  
243 cell value closest to *optimum*. Draw a random sample (n = 1) in case of  
244 ties.
- 245 f. If *optimum\_lo* < *env\_rast*(*x<sub>t+1</sub>*, *y<sub>t+1</sub>*) < *optimum\_hi* update *energy* =  
246 *energy* + *energy\_adj*[1].
- 247 g. Else, compute  $\Delta = \text{env\_rast}(x_{t+1}, y_{t+1}) - \text{optimum}$ . And update energy  
248 in the following way:
- 249 If  $\Delta < 0.1 * \text{optimum}$ , then *energy* = *energy* + *energy\_adj*[2]
- 250 If  $0.1 * \text{optimum} < \Delta < 0.2 * \text{optimum}$ , then *energy* =  
251 *energy* + *energy\_adj*[3]
- 252 If  $0.2 * \text{optimum} < \Delta < 0.3 * \text{optimum}$ , then *energy* =  
253 *energy* + *energy\_adj*[4]

254 If  $0.3 * optimum < \Delta < 0.4 * optimum$ , then  $energy =$   
255  $energy + energy\_adj[5]$

256 If  $0.4 * optimum < \Delta < 0.5 * optimum$ , then  $energy =$   
257  $energy + energy\_adj[6]$

258 If  $0.5 * optimum < \Delta < 0.6 * optimum$ , then  $energy =$   
259  $energy + energy\_adj[7]$

260 If  $0.6 * optimum < \Delta < 0.7 * optimum$ , then  $energy =$   
261  $energy + energy\_adj[8]$

262 If  $0.7 * optimum < \Delta < 0.8 * optimum$ , then  $energy =$   
263  $energy + energy\_adj[9]$

264 If  $0.8 * optimum < \Delta < 0.9 * optimum$ , then  $energy =$   
265  $energy + energy\_adj[10]$

266 If  $\Delta > 0.9 * optimum$ , then  $energy = energy + energy\_adj[11]$

267 h. If  $mortality = True$  and  $energy = 0$ , the agent dies. Set  $(x_{t+1}, y_{t+1})$   
268 through  $(x_{days}, y_{days})$  as N/A and end loop.

269 6. Return dataframe with  $days$  rows and 2 columns movement track data.  
270 7. Repeat (3)-(6)  $replicates$  times.

### 271 3. EXAMPLE APPLICATIONS

272 abmR can be used to construct ABM simulations for any desired agent across the globe. In  
273 the following example, we demonstrate how `energySIM` can be used to compare the  
274 movement and the differential energy allocation of two populations of 250 agents each.  
275 While we focus on `energySIM` in this example, a similar workflow applies for `moveSIM`.

### 276 3.1. Comparisons between populations

277 In this example, both populations are characterized by the same number of replicates,  
278 movement timesteps ('days'), the same  $\sigma$ , and the same environmental data provided by a  
279 Normalized Difference Vegetation Index (NDVI) raster stack containing 14 days of data  
280 between September 01-14, 2019 (Vermote, 2019). Both populations had an unspecified  
281 destination (indicated with '999'). However, Population 1 (P1) agents started their  
282 movements from a different point (105.7° W; 48.2 ° N) situated about 2,800 km from the  
283 origin of Population 2 (P2) agents (142.7° W; 63.2 ° N). Additionally, P1 agents had a  
284 smaller search radius (150 km) but higher motivation than P2 agents (P1 motivation = 0.95).  
285 P1 agents also had different optimum ranges (P1 0.2-0.5; P2 0.6-0.8), and different initial  
286 energy units (P1 100; P2 70). These differences in simulation parameterization result in  
287 clearly dissimilar movement tracks (Fig. 3).

| Population 1                                                                                                                                                                                                                                                                                                                                                                                                                                                                            | Population 2                                                                                                                                                                                                                                                                                                                                                                                                                                                                            |
|-----------------------------------------------------------------------------------------------------------------------------------------------------------------------------------------------------------------------------------------------------------------------------------------------------------------------------------------------------------------------------------------------------------------------------------------------------------------------------------------|-----------------------------------------------------------------------------------------------------------------------------------------------------------------------------------------------------------------------------------------------------------------------------------------------------------------------------------------------------------------------------------------------------------------------------------------------------------------------------------------|
| <pre>am.pop.1 = as.species(x = -105.7, y = 48.2) sim.move &lt;- energySIM(   replicates = 250,   days = 14,   env_rast = as.raster.stack.ndvi.sep,   search_radius = 150,   sigma = 0.1,   dest_x = 999,   dest_y = 999,   mot_x = 0.95,   mot_y = 0.95,   modeled_species = am.pop.1,   optimum_lo = 0.2,   optimum_hi = 0.5,   init_energy = 100,   direction = "S",   mortality = F,   Energy_adj = c(20,10,8,5,2,0,-2,-5,-8,-10,-20),   write_results = T,   single_rast = F)</pre> | <pre>am.pop.2 = as.species(x = -142.7, y = 63.2) simtwo.move &lt;- energySIM(   replicates = 250,   days = 14,   env_rast = as.raster.stack.ndvi.sep,   search_radius = 800,   sigma = 0.1,   dest_x = 999,   dest_y = 999,   mot_x = 0.8,   mot_y = 0.8,   modeled_species = am.pop.2,   optimum_lo = 0.6,   optimum_hi = 0.8,   init_energy = 70,   direction = "S",   mortality = F,   energy_adj = c(20,10,8,5,2,0,-2,-5,-8,-10,-20),   write_results = T,   single_rast = F)</pre> |

289 **Box 1.** R code used for performing the simulations presented in Fig 3. First, `as.species` is called  
290 to initialize two populations with different origin locations (here omitting morphology). Then,  
291 `energySIM` is called to perform a movement simulation for each population; parameters that differ

292 between the two simulations are printed in red, functions in blue, and objects in bold. For argument  
293 descriptions, see Table 2 and the package manual.

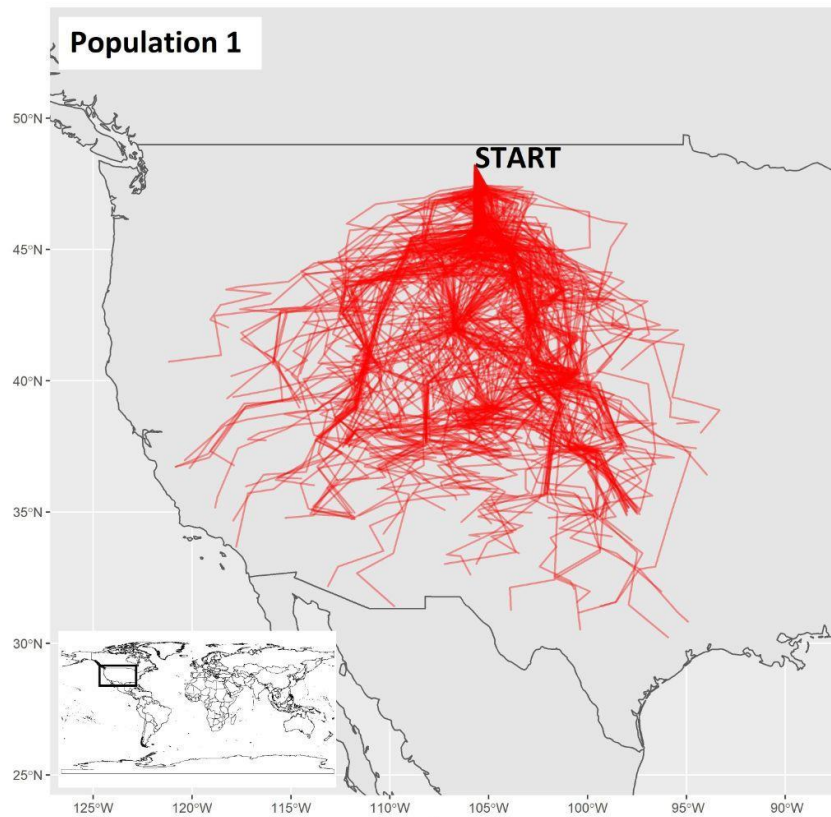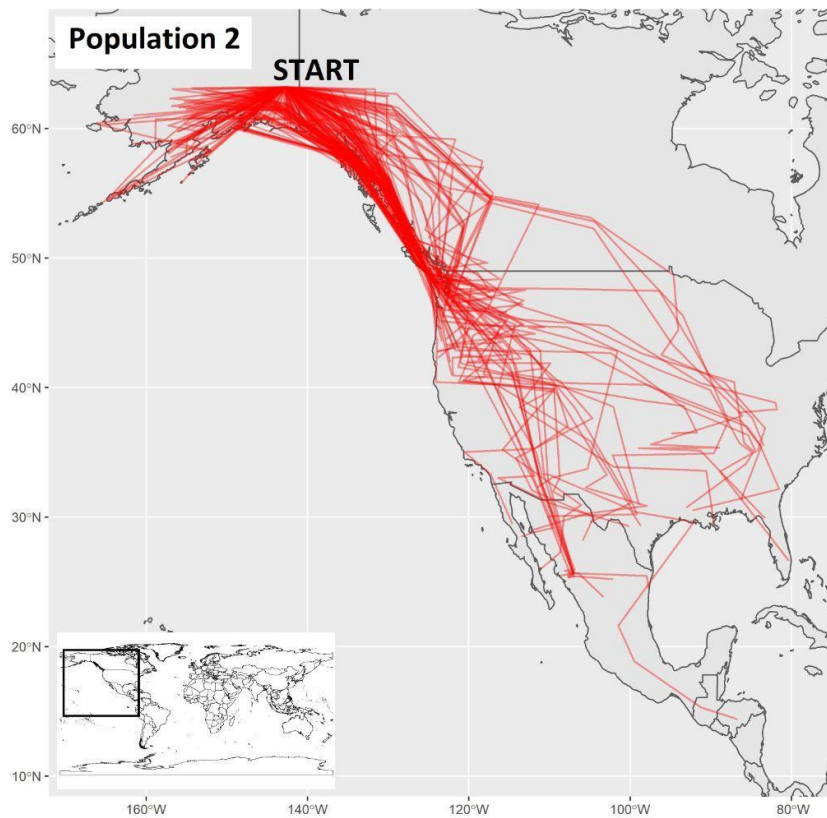

294



295 **Figure 3.** Movement tracks reveal that Population 1 tended to travel through the central United  
 296 States, while Population 2 traveled mostly throughout western Canada, United States, and Mexico.  
 297 Overall, Population 1 traveled more distance and exhibited more consistent paths near the origin than  
 298 did Population 2. The movement tracks are natively produced by abmR. Inset world map provided for  
 299 geographic reference.

300 While we can compare the movement tracks visually, Table 3 provides a numerical  
 301 description of results. In this simulation, P1 traveled a much smaller average distance (154.6  
 302 km) than did P2 (625.5 km). However, P1 traveled more days on average (7.4 days) before  
 303 stopping than P2 (3.8 days). Additionally, P2 had higher energy consumption than P1; its  
 304 average remaining energy across all timesteps was 61.2 units compared to 99.7 units for P1.  
 305 There are several possible reasons for this observed pattern. First, P2 began with a smaller  
 306 initial energy (70 units) than P1 (100 units). Additionally, P2 had higher optimum NDVI  
 307 values (0.6 - 0.8), which might have been less abundant and generally more difficult to reach  
 308 than those of P1 (0.2 - 0.5). Finally, because they began in different places, P1 and P2 agents  
 309 encountered different raster cells along their journey.

|                     | <b>variable</b>     | <b>mean</b> | <b>sd</b> | <b>median</b> | <b>min</b> | <b>max</b> | <b>range</b> |
|---------------------|---------------------|-------------|-----------|---------------|------------|------------|--------------|
| <b>Population 1</b> | day                 | 7.4         | 4         | 7             | 1          | 14         | 13           |
|                     | longitude           | -105.5      | 4.1       | -105.2        | -121.1     | -93.3      | 27.8         |
|                     | latitude            | 41.6        | 3.4       | 41.9          | 30.2       | 47.5       | 17.3         |
|                     | energy              | 99.7        | 1.3       | 100           | 80         | 100        | 20           |
|                     | delta energy        | -0.04       | 1.5       | 0             | -20        | 20         | 40           |
|                     | distance            | 154.6       | 70        | 154.4         | 5.5        | 316.7      | 311.1        |
|                     | <b>Population 2</b> | day         | 3.8       | 3.08          | 3          | 1          | 14           |
| longitude           |                     | -126        | 17.3      | -127.1        | -166       | -80.3      | 85.7         |
| latitude            |                     | 50.2        | 10.5      | 52.2          | 14.4       | 63.1       | 48.7         |
| energy              |                     | 61.2        | 17.2      | 60            | 0          | 100        | 100          |
| delta energy        |                     | -2.3        | 9.3       | -5            | -20        | 20         | 40           |
| distance            |                     | 625.5       | 294       | 649.7         | 5.5        | 1445       | 1439.4       |

310

311 **Table 3.** A numerical comparison of Populations 1 and 2, created by using values across all timesteps  
312 for all agents. ‘Day’ summarizes the timestep variable of the movement tracks. ‘Longitude’ and  
313 ‘latitude’ summarize the geographical position of agents, while ‘energy’ summarizes agents’  
314 remaining energy. ‘Delta energy’ corresponds to the change (gain or loss) of energy between each  
315 timestep, while ‘distance’ refers to the distance traveled between each timestep. This table was  
316 produced outside of abmR using raw movement data returned by the package.

317 Fig. 4 visually compares P1 and P2 movement outputs based on longitude and latitude. This  
318 is not a native abmR figure, but rather is produced using the raw data that abmR generates to  
319 show the flexible use of the package. In this figure, P1 movements tended to be to the east  
320 and south of P2. However, P2 trajectory shows a much wider distribution, with density points  
321 extending to the lower values of latitude.

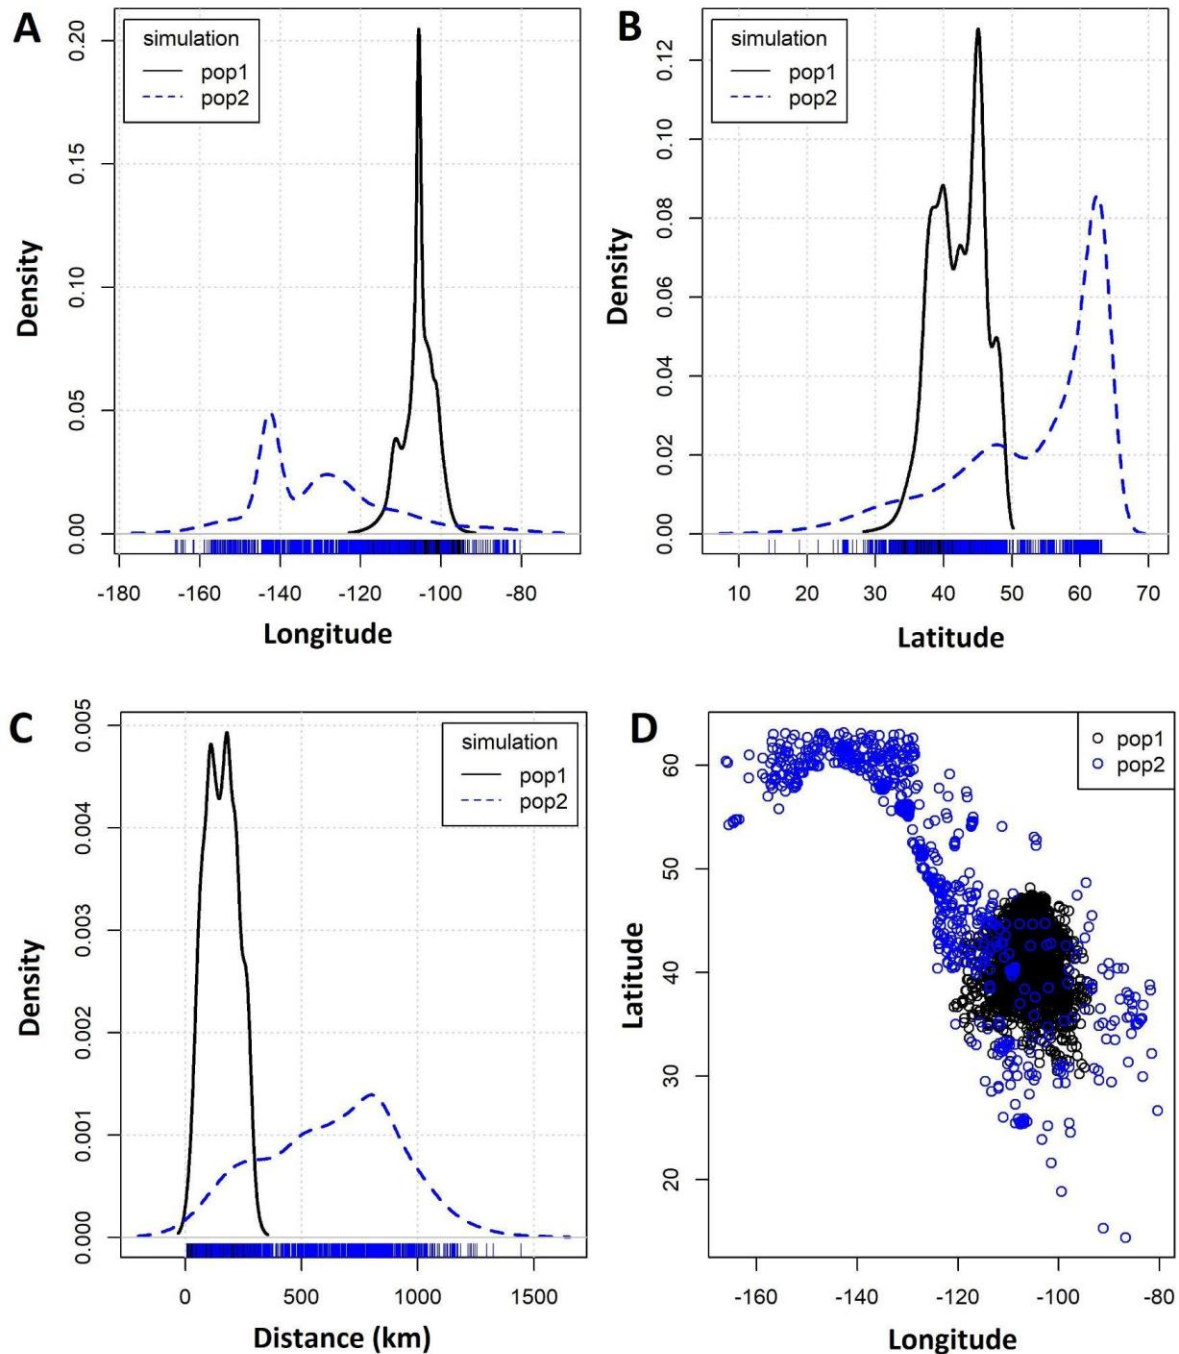

322

323 **Figure 4.** Graphical comparisons of Population 1 and Population 2 movements. Panels A and B show  
324 density plots used to individually compare longitude (Panel A) and latitude (Panel B) coordinates  
325 attained by agents from each population. Panel C compares the distance traveled between each  
326 timestep, while Panel D shows geographical position for all agents in each population across all  
327 timesteps.

328 Finally, Fig. 5 provides a density surface plot for P2 describing agent energy gains (blue) and  
329 losses (red) across the landscape. This surface was created using the inverse distance  
330 weighted interpolation (IDW) function from the R package ‘gstat’ (Pebesma, 2004). IDW  
331 interpolates grid cell values across a surface using a linear combination of observed (sample)  
332 points. When interpolating a cell value, the value of the sample points closer to that cell carry  
333 a higher weight, while sample points further from that cell carry smaller weight. IDW is  
334 discussed in more detail in Wong (2017). The results from Fig. 5 match well with what we  
335 observe in Fig. 3. Movement tracks for P2 tend to follow the blue (energy gain) regions.

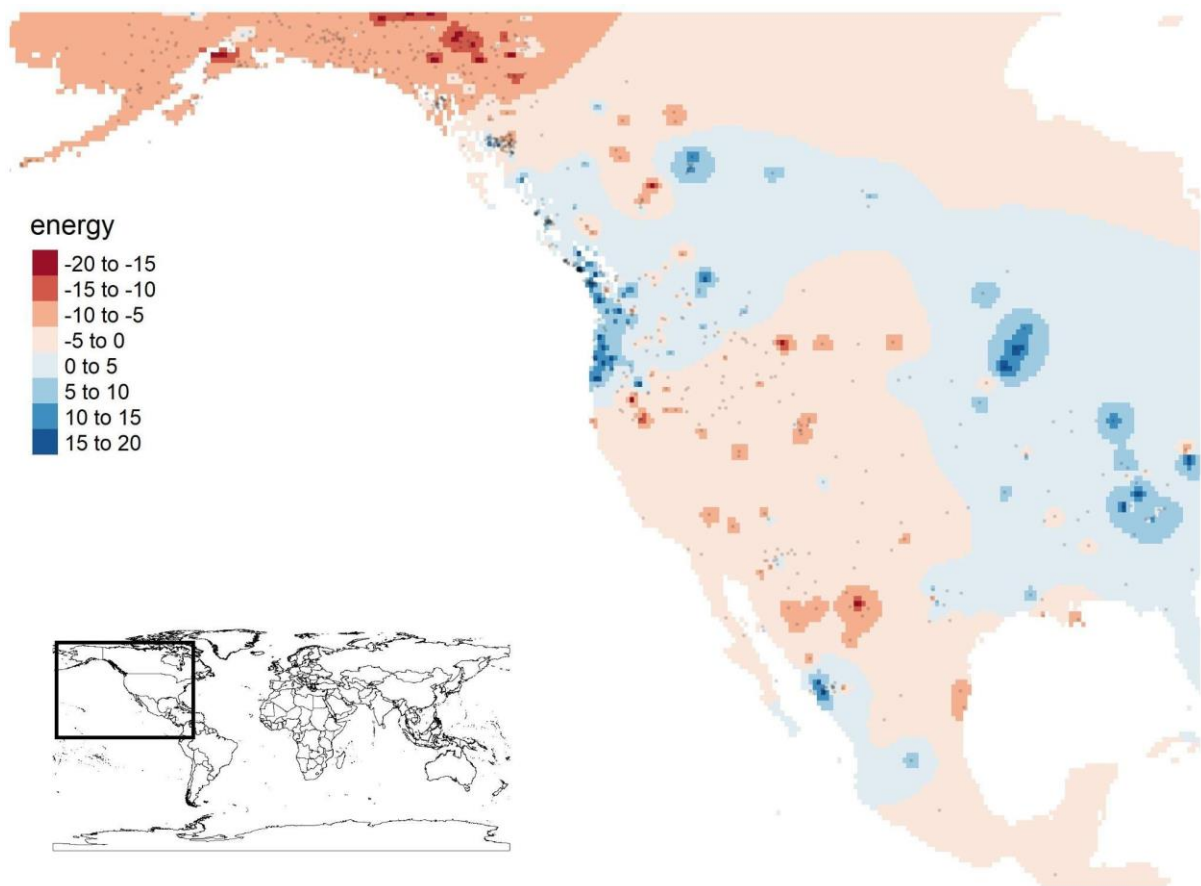

336

337 **Figure 5.** Energy gradient plot of Population 2 by timestep. Areas in red reflect energy loss (less  
338 suitable environmental values) while areas in blue reflect energy gain (better environmental values).  
339 This plot is produced directly by *energyVIZ*. Inset world map added for geographic reference.

340

#### 341 4. CONCLUSIONS AND FUTURE WORK

342 abmR provides a novel and efficient programming platform for simulating large-scale  
343 movements of species across taxa. We ran most of the initial test simulations on a local  
344 machine equipped with an Intel® Core™ i7-5500U CPU – 2.40GHz and 8 GB of RAM and  
345 obtained results for 100-1000 agents within minutes. The novelty of the software includes the  
346 capability of concurrently modeling agent movement trajectories and energy budget. This  
347 feature enables a broader exploration of the ecological constraints that shape animal dispersal  
348 and/or migration. Moreover, abmR built-in arguments, such as *fail\_tresh*, *n\_failures*, and  
349 *energy\_adj*, provide additional flexibility when evaluating mortality scenarios that depend on  
350 baseline environmental conditions and energy requirement during prolonged movement bouts  
351 (see Table 2 for a full list of arguments affecting mortality).

352 Over the last decades, spatially explicit simulations and agent-based models have become  
353 more popular in ecological and evolutionary studies (Railsback et al., 2006; DeAngelis &  
354 Grimm, 2014). Analytical platforms, such as InSTREAM, a simulation model approach  
355 designed to understand how stream and river salmonid populations respond to habitat  
356 alteration (Railsback et al., 2009), or ALMaSS, a predictive modeling tool for answering  
357 environmental policy questions regarding the effect of changing landscape structure on  
358 threatened animal species (Topping et al., 2003), allow investigation of specific ecological  
359 systems using ABM. On the other hand, many programming languages such as Netlogo, R, or  
360 Python are widely used to develop custom and more flexible models that can be adapted to  
361 address complex ecological or evolutionary research scenarios (Lustig et al., 2019; Chubaty  
362 & McIntire, 2021). However, the use of a programming language to develop a flexible ABM  
363 from scratch has two important drawbacks. First, it requires advanced programming skills.  
364 Second, its reproducibility can be compromised by the idiosyncrasies of the simulation

365 algorithm written by the user. These idiosyncrasies, especially if not well documented, can  
366 make it difficult or even impossible for other researchers to replicate findings or adapt code  
367 to suit their modeling scenarios. `abmR` provides a novel framework to perform complex  
368 movement simulations through standardized functions and arguments that facilitate model  
369 annotation and reproducibility while providing publication-ready visualizations at the end of  
370 each run.

371 While we developed and tested `abmR` as a movement and energy budget simulation tool, its  
372 core software functionalities can be adapted to explore other processes such as disease  
373 outbreak scenarios (Dougherty et al., 2018). As an example, pathogen vector movement can  
374 be easily simulated within `abmR`, allowing the study of areas of confluence where disease  
375 transmission is more probable (Manore et al., 2015). Moreover, potential future updates  
376 include the ability to specify multiple raster stacks of different movement predictors and  
377 different species traits affecting the movement patterns in the function `as.species`.  
378 Additionally, other code expansions might be useful to study plant seed dispersal, interactions  
379 of agents (density-dependent scenarios), and altitudinal movements.

## 380 **Acknowledgements**

381 We thank anonymous reviewers who provided invaluable feedback on an earlier draft. `abmR`  
382 relies heavily on a large set of R packages and we thank the R community for providing  
383 support and open-source code.

## 384 **Author Contributions**

385 B.G. led the development of the package and contributed extensively to the writing of the  
386 manuscript; J.F.L. contributed to the package, writing, and critical review of the manuscript;

387 A.C. conceived the manuscript, led its writing, contributed to the package, and performed  
388 package testing.

### 389 **Conflict of Interest Statement**

390 The authors declare that there are no financial or non-financial conflicts of interest.

### 391 **Data Availability**

392 abmR and the simulation results for Populations 1 and 2 are available for download from  
393 Github at <https://github.com/bgoch5/abmR>. The environmental raster data used in the  
394 examples is available at <https://www.ncei.noaa.gov>.

### 395 **Funding**

396 This study was supported in part by research grants from the U.S. National Science  
397 Foundation (grants nos. EF 1840230 and DGE 1545261 and DEB 1911955), the National  
398 Natural Science Foundation of China (81961128002), and by the Corix Plains Institute.

399

400

401

402

403

404

405

406

407

## 408 **References**

- 409 Alerstam, T. (1993). *Bird migration*. Cambridge University Press.
- 410 Araujo, M. B. & Guisan, A. (2006). Five (or so) challenges for species distribution  
411 modelling. *J. Biogeogr.* 33: 1677–1688.
- 412 Aurbach, A., Schmid, B., Liechti, F., Chokani, N., & Abhari, R. (2020). Simulation of broad  
413 front bird migration across Western Europe. *Ecological Modelling*, 415, 108879.
- 414 Berg, H. C. (1983). *Random Walks in Biology*. Princeton Univ. Press, Princeton, NJ.
- 415 Bridge, E.S., Ross, J.D., Contina, A.J., & Kelly, J.F., 2017. Using Agent-Based Models to  
416 Scale from Individuals to Populations. In *Aeroecology* (pp. 259-275). Springer, Cham.
- 417 Brown, D. G., & Robinson, D. T. (2006). Effects of heterogeneity in residential preferences  
418 on an agent-based model of urban sprawl. *Ecology and society*, 11(1).
- 419 Chubaty A. M., & McIntire E.J.B. (2021). SpaDES: Develop and Run Spatially Explicit  
420 Discrete Event Simulation Models. R package version 2.0.7. [https://CRAN.R-](https://CRAN.R-project.org/package=SpaDES)  
421 [project.org/package=SpaDES](https://CRAN.R-project.org/package=SpaDES)
- 422 Cushman, S. A., & Lewis, J. S. (2010). Movement behavior explains genetic differentiation  
423 in American black bears. *Landscape ecology*, 25(10), 1613-1625.
- 424 DeAngelis, D. L., & Grimm, V. (2014). Individual-based models in ecology after four  
425 decades. *F1000prime reports*, 6.
- 426 Dingle, H. (2014). *Migration: the biology of life on the move*. Oxford University Press, USA.
- 427 Dodge, S., Bohrer, G., Bildstein, K., Davidson, S.C., Weinzierl, R., Bechard, M.J., Barber,  
428 D., Kays, R., Brandes, D., Han, J., & Wikelski, M. (2014). Environmental drivers of  
429 variability in the movement ecology of turkey vultures (*Cathartes aura*) in North and South  
430 America. *Philosophical Transactions of the Royal Society B: Biological Sciences*, 369(1643),  
431 p.20130195.
- 432 Dougherty, E.R., Seidel, D.P., Carlson, C.J., Spiegel, O., & Getz, W.M., 2018. Going through  
433 the motions: incorporating movement analyses into disease research. *Ecology letters*, 21(4),  
434 pp.588-604.
- 435 Giuggioli, L., & Bartumeus, F. (2010). Animal movement, search strategies and behavioural  
436 ecology: a cross-disciplinary way forward. *Journal of Animal Ecology*, 79(4), 906-909.
- 437 Goldstein, E., Erinjery, J. J., Martin, G., Kasturiratne, A., Ediriweera, D. S., de Silva, H. J., ...  
438 & Iwamura, T. (2021). Integrating human behavior and snake ecology with agent-based  
439 models to predict snakebite in high risk landscapes. *PLoS neglected tropical diseases*, 15(1),  
440 e0009047.



- 441 Grimm, V., Revilla, E., Berger, U., Jeltsch, F., Mooij, W. M., Railsback, S. F., ... &  
442 DeAngelis, D. L. (2005). Pattern-oriented modeling of agent-based complex systems: lessons  
443 from ecology. *science*, 310(5750), 987-991.
- 444 Grimm, V., & Railsback, S. F. (2013). *Individual-based modeling and ecology*. Princeton  
445 university press.
- 446 Hawkes, C. (2009). Linking movement behaviour, dispersal and population processes: is  
447 individual variation a key?. *Journal of Animal Ecology*, 78(5), 894-906.
- 448 Hedenström, A. (2008). Adaptations to migration in birds: behavioural strategies,  
449 morphology and scaling effects. *Philosophical Transactions of the Royal Society B:*  
450 *Biological Sciences*, 363(1490), pp.287-299.
- 451 Holdo, R. M., & Roach, R. R. (2013). Inferring animal population distributions from  
452 individual tracking data: theoretical insights and potential pitfalls. *Journal of Animal*  
453 *Ecology*, 82(1), 175-181.
- 454 Klimek, P., Poledna, S., Farmer, J. D., & Thurner, S. (2015). To bail-out or to bail-in?  
455 Answers from an agent-based model. *Journal of Economic Dynamics and Control*, 50, 144-  
456 154.
- 457 Lustig, A., James, A., Anderson, D., & Plank, M. (2019). Pest control at a regional scale:  
458 Identifying key criteria using a spatially explicit, agent-based model. *Journal of Applied*  
459 *Ecology*, 56(7), 1515-1527.
- 460 Manore, C.A., Hickmann, K.S., Hyman, J.M., Foppa, I.M., Davis, J.K., Wesson, D.M., &  
461 Mores, C.N. (2015). A network-patch methodology for adapting agent-based models for  
462 directly transmitted disease to mosquito-borne disease. *Journal of biological dynamics*, 9(1),  
463 pp.52-72.
- 464 Nathan, R., Getz, W. M., Revilla, E., Holyoak, M., Kadmon, R., Saltz, D., & Smouse, P. E.  
465 (2008). A movement ecology paradigm for unifying organismal movement research.  
466 *Proceedings of the National Academy of Sciences*, 105(49), 19052-19059.
- 467 Pebesma, E.J. (2004). Multivariable geostatistics in S: the gstat package. *Computers &*  
468 *Geosciences*, 30: 683-691.
- 469 Polhill, J. G., Parker, D., Brown, D., & Grimm, V. (2008). Using the ODD protocol for  
470 describing three agent-based social simulation models of land-use change. *Journal of*  
471 *Artificial Societies and Social Simulation*, 11(2), 3.
- 472 Railsback, S. F., Lytinen, S. L., & Jackson, S. K. (2006). Agent-based simulation platforms:  
473 Review and development recommendations. *Simulation*, 82(9), 609-623.
- 474 Railsback, S. F., Harvey, B. C., Jackson, S. K., & Lamberson, R. H. (2009). InSTREAM: the  
475 individual-based stream trout research and environmental assessment model. *Gen. Tech. Rep.*

- 476 PSW-GTR-218. Albany, CA: US Department of Agriculture, Forest Service, Pacific  
477 Southwest Research Station. 254 p, 218.
- 478 Tang, W., & Bennett, D.A. (2010). Agent-based modeling of animal movement: a review.  
479 *Geography Compass*, 4(7), pp.682-700.
- 480 Thiele, J. C., Kurth, W., & Grimm, V. (2012). RNetLogo: An R package for running and  
481 exploring individual-based models implemented in NetLogo. *Methods in Ecology and*  
482 *Evolution*, 3(3), 480-483.
- 483 Topping, C. J., Hansen, T. S., Jensen, T. S., Jepsen, J. U., Nikolajsen, F., & Odderskær, P.  
484 (2003). ALMaSS, an agent-based model for animals in temperate European landscapes.  
485 *Ecological Modelling*, 167(1-2), 65-82.
- 486 Uhlenbeck, G. E., & Ornstein, L. S. (1930). On the theory of the Brownian motion. *Physical*  
487 *review*, 36(5), 823
- 488 Vermote, Eric; NOAA CDR Program. (2019): NOAA Climate Data Record (CDR) of  
489 AVHRR Normalized Difference Vegetation Index (NDVI), Version 5. NOAA National  
490 Centers for Environmental Information. <https://doi.org/10.7289/V5ZG6QH9>.
- 491 Willem, L., Verelst, F., Bilcke, J., Hens, N., & Beutels, P. (2017). Lessons from a decade of  
492 individual-based models for infectious disease transmission: a systematic review (2006-  
493 2015). *BMC infectious diseases*, 17(1), 1-16.
- 494 Williams, H. J., Taylor, L. A., Benhamou, S., Bijleveld, A. I., Clay, T. A., de Grissac, S., ...  
495 & Börger, L. (2020). Optimizing the use of biologgers for movement ecology research.  
496 *Journal of Animal Ecology*, 89(1), 186-206.
- 497 Wong, D. W. (2016). Interpolation: Inverse-Distance Weighting. *International Encyclopedia*  
498 *of Geography: People, the Earth, Environment and Technology: People, the Earth,*  
499 *Environment and Technology*, 1-7.

500

501

502

503

504
